# Supplementary material
Source: PubMed Central journal article supplement (PMC3489151)
Supplement: supp_mcs210_mcs210supp.pdf [file supp_mcs210_mcs210supp.pdf]

## SUPPLEMENTARY DATA

TABLE S1. List and location of the *Pinus pinaster* populations comprised in the present study. GG= genetic group (as identified by STRUCTURE; see main text); MTCM = mean temperature of the coldest month (°C); MTWM = mean temperature of the warmest month (°C); AMT= annual mean temperature (°C); CI = continentality index (°C); PWM = precipitation during the warmest quarter (mm); AP = annual mean precipitation (mm).

| Population and abbreviation |      | Latitude | Longitude | GG  | Altitude | MTCM | MTWM | AMT  | CI   | PWM | AP   |
|-----------------------------|------|----------|-----------|-----|----------|------|------|------|------|-----|------|
| Mimizan                     | Mimi | 44°80'N  | 1°18'W    | AF  | 37       | 3.2  | 24.8 | 13.3 | 21.6 | 232 | 1235 |
| Pleucadec                   | Pleu | 47°46'N  | 2°20'W    | AF  | 80       | 2.5  | 21.9 | 11.2 | 19.4 | 154 | 804  |
| Alto de la Llama            | Alto | 43°17'N  | 6°29'W    | AIP | 503      | 2.6  | 23.4 | 11.7 | 20.8 | 149 | 1137 |
| Armayán                     | Arma | 43°18'N  | 6°27'W    | AIP | 498      | 2.0  | 24.0 | 11.8 | 22.0 | 152 | 1112 |
| Cadavedo                    | Cada | 43°32'N  | 6°25'W    | AIP | 210      | 5.0  | 22.0 | 13.2 | 17.0 | 204 | 1316 |
| Castropol                   | Cast | 43°30'N  | 6°58'W    | AIP | 391      | 4.5  | 22.0 | 12.6 | 17.5 | 184 | 1179 |
| Lamuño                      | Lamu | 43°33'N  | 6°13'W    | AIP | 125      | 5.3  | 22.7 | 13.4 | 17.4 | 192 | 1282 |
| Leiria                      | Leir | 39°47'N  | 8°57'W    | AIP | 20       | 7.4  | 24.4 | 15.4 | 17.0 | 44  | 811  |
| Puerto de Vega              | Puer | 43°32'N  | 6°37'W    | AIP | 121      | 4.9  | 22.6 | 13.4 | 17.7 | 194 | 1283 |
| San Cipriano de Ribarteme   | San  | 42°70'N  | 8°21'W    | AIP | 300      | 2.7  | 26.0 | 12.3 | 23.3 | 121 | 1600 |
| Sierra de Barcia            | Sier | 43°31'N  | 6°29'W    | AIP | 240      | 4.7  | 22.4 | 13.0 | 17.7 | 192 | 1339 |
| Pineta                      | Pine | 41°58'N  | 9°20'E    | CO  | 750      | 6.7  | 26.0 | 15.5 | 19.3 | 42  | 583  |
| Pinia                       | Pini | 42°10'N  | 9°27'E    | CO  | 10       | 6.3  | 26.9 | 15.6 | 20.6 | 49  | 580  |
| Oria                        | Oria | 37°31'N  | 2°21'W    | MO  | 1223     | 0.4  | 30.7 | 13.1 | 30.3 | 29  | 357  |
| Tamrabta                    | Tamr | 33°36'N  | 5°10'W    | MO  | 1758     | -4.6 | 30.4 | 10.7 | 35.0 | 49  | 745  |
| Arenas de San Pedro         | Aren | 40°11'N  | 5°60'W    | MS  | 733      | 1.2  | 33.4 | 14.2 | 32.2 | 73  | 1318 |
| Bayubas de Abajo            | Bayu | 41°31'N  | 2°52'W    | MS  | 998      | -1.4 | 29.6 | 10.6 | 30.9 | 96  | 553  |
| Carbonero                   | Carb | 41°10'N  | 4°16'W    | MS  | 845      | -0.7 | 31.3 | 12.3 | 32.0 | 72  | 435  |
| Cenicientos                 | Ceni | 40°16'N  | 4°29'W    | MS  | 1100     | 1.3  | 28.8 | 12.4 | 27.5 | 60  | 794  |
| Coca                        | Coca | 41°15'N  | 4°29'W    | MS  | 800      | -0.6 | 31.2 | 12.3 | 31.8 | 77  | 454  |
| Cuellar                     | Cuel | 41°22'N  | 4°29'W    | MS  | 830      | -0.6 | 30.9 | 12.2 | 31.6 | 72  | 468  |
| San Leonardo                | SanL | 41°50'N  | 3°30'W    | MS  | 1096     | -2.7 | 27.9 | 9.3  | 30.6 | 120 | 753  |
| Valdemaqueda                | Vald | 40°30'N  | 4°18'W    | MS  | 890      | 0.5  | 29.2 | 12.1 | 28.7 | 70  | 681  |

TABLE S2. Summary information of nuSSR markers used to estimate range-wide population genetic structure in *Pinus pinaster*. Name = locus name; Motif = SSR repeated motif; Label = fluorescent label; Min, Max = minimum and maximum allele sizes per locus; *N* = number of alleles per locus.

| Name     | Motif            | Label | Forward sequence     | Reverse sequence        | Min | Max | <i>N</i> |
|----------|------------------|-------|----------------------|-------------------------|-----|-----|----------|
| A6F03    | (AC)17           | VIC   | CCTGAAAATCGACGGATCG  | ATGGTATTTTGC GGGTTGC    | 258 | 272 | 8        |
| rptest1  | (ATC)7           | NED   | AGGATGCCTATGATATGCGC | AACCATAACAAAAGCGGTCG    | 131 | 171 | 18       |
| Ctg4363  | (AT)10           | VIC   | TAATAATTCAAGCCACCCCG | AGCAGGCTAATAACAACACGC   | 108 | 124 | 8        |
| NZPR1078 | (AC)10           | PET   | TGGTGATCAAGCCTTTTTCC | GTTGATGAGTGATGGCATGG    | 239 | 259 | 10       |
| epi3     | (TC)15           | NED   | AGCAACATTTCCCTGGACAC | GGAATAATTGCAGTTGCAGTAGC | 202 | 216 | 7        |
| gPp14    | (ATT)9           | VIC   | TATTGACGGTGTCTCTTCCT | GACTTTGACCTAAAGCATGG    | 215 | 237 | 8        |
| pEST2669 | (TA)19           | NED   | ATTGCTTCTGAAAGGGCATC | TCCCTTGGCACCATGTTAAT    | 202 | 229 | 6        |
| epi5     | (TA)9            | PET   | GGCGCGAACTACTTCATCTG | CAATGCTGACAAACCCAGAA    | 166 | 202 | 16       |
| NZPR544  | (CA)5(AC)12(TA)5 | FAM   | GCGATGTGCAACCCTTGATA | TGCTATTCCGTCAAAAACCC    | 340 | 359 | 8        |
| ctg 275  | (AT)16           | FAM   | ACGGAGATATATTGCTGGCG | AAAGAATAACGTGAAACAAACCC | 259 | 269 | 6        |
| epi6     | (AT)9            | FAM   | CCCACCATGACAAGGTTGAT | CGCTGGGCTTGAACATCTA     | 161 | 185 | 11       |
| ITPH4516 | (CT)27           | PET   | TGATGCAAACAAGTTCCATG | AGCACTCGCTAAACTATGAAGG  | 223 | 238 | 6        |

TABLE S3. Size- dependent fitness components for male reproduction in 23 natural *Pinus pinaster* populations. GG = genetic Group;  $m\mu$  = intercept of logistic regressions;  $m\alpha$  = slope of logistic regressions; mTSFR = median threshold size for male reproduction; loCI,upCI = lower and upper 95% limits of Bayesian credible intervals for mTSFR; LVI = largest vegetative individual respect to male reproduction; SRI = smallest individual bearing male cones; mRAN = transition range (mLVI–mSRI); mVEG = number of vegetative individuals. na = not available.

| Pop  | GG  | $m\mu \pm \text{s.e.}$           | $m\alpha \pm \text{s.e.}$                  | mTSFR | loCI  | upCI  | mLVI | mSRI | mRAN | %mVEG |
|------|-----|----------------------------------|--------------------------------------------|-------|-------|-------|------|------|------|-------|
| Mimi | AF  | $-10.72 \pm 5.91 \times 10^{-2}$ | $4.15 \times 10^{-2} \pm 2 \times 10^{-4}$ | 258.2 | 220.1 | 291.1 | 378  | 146  | 232  | 4.2   |
| Pleu | AF  | $-8.40 \pm 3.43 \times 10^{-2}$  | $3.00 \times 10^{-2} \pm 1 \times 10^{-4}$ | 283.6 | 264.4 | 294.8 | 327  | 120  | 207  | 2.8   |
| Alto | AIP | $-7.19 \pm 4.39 \times 10^{-2}$  | $2.77 \times 10^{-2} \pm 2 \times 10^{-4}$ | 234.2 | 217.0 | 258.7 | 300  | 134  | 166  | 1.5   |
| Arma | AIP | $-9.78 \pm 2.71 \times 10^{-2}$  | $4.15 \times 10^{-2} \pm 2 \times 10^{-4}$ | 248.4 | 232.6 | 267.9 | 313  | 118  | 195  | 7.0   |
| Cada | AIP | $-5.86 \pm 3.22 \times 10^{-2}$  | $2.36 \times 10^{-2} \pm 1 \times 10^{-4}$ | 226.7 | 209.3 | 250.4 | 231  | 78   | 153  | 1.1   |
| Cast | AIP | $-4.81 \pm 2.95 \times 10^{-2}$  | $2.22 \times 10^{-2} \pm 1 \times 10^{-4}$ | 230.0 | 203.5 | 252.5 | 410  | 94   | 316  | 4.1   |
| Lamu | AIP | $-8.88 \pm 5.13 \times 10^{-2}$  | $3.56 \times 10^{-2} \pm 2 \times 10^{-4}$ | 232.1 | 209.4 | 248.3 | 257  | 113  | 144  | 1.5   |
| Leir | AIP | $-8.68 \pm 3.72 \times 10^{-2}$  | $3.61 \times 10^{-2} \pm 1 \times 10^{-4}$ | 260.4 | 248.0 | 271.8 | 376  | 100  | 276  | 0.8   |
| Puer | AIP | $-9.30 \pm 6.27 \times 10^{-2}$  | $4.18 \times 10^{-2} \pm 2 \times 10^{-4}$ | 247.2 | 217.5 | 271.4 | 280  | 126  | 154  | 4.9   |
| San  | AIP | $-11.61 \pm 7.56 \times 10^{-2}$ | $5.21 \times 10^{-2} \pm 3 \times 10^{-4}$ | 227.1 | 209.2 | 244.0 | 267  | 137  | 130  | 2.6   |
| Sier | AIP | $-4.96 \pm 4.14 \times 10^{-2}$  | $2.16 \times 10^{-2} \pm 2 \times 10^{-4}$ | 233.4 | 217.1 | 248.8 | 282  | 119  | 163  | 4.3   |
| Pine | CO  | na                               | na                                         | na    |       |       | 467  | 127  | 340  | na    |
| Pini | CO  | $-6.23 \pm 4.67 \times 10^{-2}$  | $2.51 \times 10^{-2} \pm 2 \times 10^{-4}$ | 238.2 | 215.4 | 263.9 | 347  | 111  | 236  | 1.9   |
| Oria | MO  | $-8.59 \pm 3.06 \times 10^{-2}$  | $3.56 \times 10^{-2} \pm 1 \times 10^{-4}$ | 231.9 | 219.8 | 243.8 | 338  | 101  | 237  | 4.9   |
| Tamr | MO  | $-9.54 \pm 4.84 \times 10^{-2}$  | $3.47 \times 10^{-2} \pm 2 \times 10^{-4}$ | 296.6 | 273.1 | 316.7 | 383  | 105  | 278  | 3.2   |
| Aren | MS  | $-7.49 \pm 3.55 \times 10^{-2}$  | $3.14 \times 10^{-2} \pm 1 \times 10^{-4}$ | 240.2 | 226.0 | 252.7 | 392  | 112  | 280  | 6.3   |
| Bayu | MS  | $-8.12 \pm 3.04 \times 10^{-2}$  | $3.21 \times 10^{-2} \pm 1 \times 10^{-4}$ | 239.1 | 229.7 | 255.3 | 361  | 108  | 253  | 4.2   |
| Carb | MS  | $-8.38 \pm 6.01 \times 10^{-2}$  | $3.64 \times 10^{-2} \pm 3 \times 10^{-4}$ | 228.8 | 213.0 | 249.8 | 290  | 117  | 173  | 8.3   |
| Ceni | MS  | $-6.03 \pm 4.93 \times 10^{-2}$  | $2.86 \times 10^{-2} \pm 2 \times 10^{-4}$ | 208.6 | 172.1 | 246.4 | 353  | 132  | 221  | 1.8   |
| Coca | MS  | $-9.13 \pm 4.27 \times 10^{-2}$  | $3.35 \times 10^{-2} \pm 2 \times 10^{-4}$ | 250.8 | 237.2 | 269.7 | 296  | 118  | 178  | 10.3  |
| Cuel | MS  | $-7.07 \pm 3.17 \times 10^{-2}$  | $3.01 \times 10^{-2} \pm 1 \times 10^{-4}$ | 246.8 | 228.6 | 264.4 | 345  | 106  | 239  | 3.3   |
| SanL | MS  | $-9.77 \pm 4.18 \times 10^{-2}$  | $4.00 \times 10^{-2} \pm 2 \times 10^{-4}$ | 229.7 | 207.7 | 255.7 | 283  | 80   | 203  | 4.4   |
| Vald | MS  | $-6.92 \pm 3.93 \times 10^{-2}$  | $2.93 \times 10^{-2} \pm 2 \times 10^{-4}$ | 225.6 | 200.9 | 242.3 | 272  | 111  | 161  | 4.1   |

TABLE S4. Size-dependent fitness components for female reproduction in 23 natural *Pinus pinaster* populations. GG = genetic Group;  $f\mu$  = intercept of logistic regressions;  $f\alpha$  = slope of logistic regressions; fTSFR = median threshold size for female reproduction; loCI, upCI = lower and upper 95% limits of Bayesian credible intervals for fTSFR; fLVI = largest vegetative individual respect to female reproduction; fSRI = smallest individual bearing female cones; fRAN = transition range (fLVI–fSRI), fVEG = number of vegetative individuals. na not available.

| Pop  | GG  | $f\mu \pm \text{s.e.}$          | $f\alpha \pm \text{s.e.}$                  | fTSFR | loCI  | upCI  | fLVI | fSRI | fRAN | %fVEG |
|------|-----|---------------------------------|--------------------------------------------|-------|-------|-------|------|------|------|-------|
| Mimi | AF  | $-6.79 \pm 2.23 \times 10^{-2}$ | $2.00 \times 10^{-2} \pm 1 \times 10^{-4}$ | 316.8 | 301.2 | 346.9 | 404  | 129  | 249  | 2.1   |
| Pleu | AF  | $-5.75 \pm 1.71 \times 10^{-2}$ | $2.15 \times 10^{-2} \pm 1 \times 10^{-4}$ | 258.0 | 236.3 | 280.9 | 422  | 115  | 212  | 7.4   |
| Alto | AIP | $-5.47 \pm 2.22 \times 10^{-2}$ | $1.16 \times 10^{-2} \pm 1 \times 10^{-4}$ | 426.6 | 368.0 | 522.8 | 403  | 126  | 174  | 0     |
| Arma | AIP | $-5.32 \pm 2.32 \times 10^{-2}$ | $1.51 \times 10^{-2} \pm 1 \times 10^{-4}$ | 381.7 | 341.0 | 451.0 | 391  | 92   | 221  | 0     |
| Cada | AIP | $-6.42 \pm 3.05 \times 10^{-2}$ | $1.43 \times 10^{-2} \pm 1 \times 10^{-4}$ | 458.4 | 399.0 | 531.9 | 470  | 138  | 93   | 0     |
| Cast | AIP | $-5.53 \pm 2.59 \times 10^{-2}$ | $1.55 \times 10^{-2} \pm 1 \times 10^{-4}$ | 363.6 | 299.4 | 418.7 | 410  | 84   | 326  | 1.4   |
| Lamu | AIP | $-4.97 \pm 1.76 \times 10^{-2}$ | $1.33 \times 10^{-2} \pm 1 \times 10^{-4}$ | 385.9 | 336.2 | 426.8 | 430  | 100  | 157  | 0     |
| Leir | AIP | $-5.26 \pm 1.96 \times 10^{-2}$ | $1.06 \times 10^{-2} \pm 1 \times 10^{-4}$ | 490.4 | 399.4 | 576.8 | 448  | 100  | 276  | 0     |
| Puer | AIP | $-6.62 \pm 3.02 \times 10^{-2}$ | $1.39 \times 10^{-2} \pm 1 \times 10^{-4}$ | 450.6 | 391.5 | 524.0 | 429  | 149  | 131  | 0     |
| San  | AIP | $-4.31 \pm 2.27 \times 10^{-2}$ | $1.66 \times 10^{-2} \pm 1 \times 10^{-4}$ | 262.7 | 228.1 | 303.4 | 353  | 78   | 189  | 2.6   |
| Sier | AIP | $-5.16 \pm 3.42 \times 10^{-2}$ | $0.96 \times 10^{-2} \pm 1 \times 10^{-4}$ | 480.2 | 381.3 | 578.9 | 364  | 118  | 164  | 0     |
| Pine | CO  | na                              | na                                         | na    |       |       | 467  | 263  | 204  | na    |
| Pini | CO  | $-8.44 \pm 6.33 \times 10^{-2}$ | $2.77 \times 10^{-2} \pm 2 \times 10^{-4}$ | 368.8 | 294.0 | 448.9 | 458  | 147  | 200  | 0     |
| Oria | MO  | $-5.08 \pm 1.48 \times 10^{-2}$ | $1.84 \times 10^{-2} \pm 1 \times 10^{-4}$ | 284.7 | 256.3 | 310.2 | 366  | 85   | 253  | 2.1   |
| Tamr | MO  | $-6.40 \pm 1.73 \times 10^{-2}$ | $2.22 \times 10^{-2} \pm 1 \times 10^{-4}$ | 276.8 | 259.0 | 300.3 | 383  | 78   | 305  | 6.4   |
| Aren | MS  | $-5.77 \pm 1.99 \times 10^{-2}$ | $1.85 \times 10^{-2} \pm 1 \times 10^{-4}$ | 325.9 | 293.1 | 371.9 | 400  | 112  | 280  | 1.6   |
| Bayu | MS  | $-4.46 \pm 1.25 \times 10^{-2}$ | $1.80 \times 10^{-2} \pm 1 \times 10^{-4}$ | 246.9 | 233.0 | 269.6 | 366  | 94   | 267  | 3.5   |
| Carb | MS  | $-5.26 \pm 2.49 \times 10^{-2}$ | $2.20 \times 10^{-2} \pm 1 \times 10^{-4}$ | 233.2 | 211.2 | 271.3 | 314  | 99   | 191  | 6.3   |
| Ceni | MS  | $-5.43 \pm 2.53 \times 10^{-2}$ | $1.95 \times 10^{-2} \pm 1 \times 10^{-4}$ | 287.2 | 242.7 | 333.5 | 364  | 111  | 242  | 1.8   |
| Coca | MS  | $-5.41 \pm 3.47 \times 10^{-2}$ | $1.65 \times 10^{-2} \pm 1 \times 10^{-4}$ | 306.4 | 241.0 | 501.0 | 367  | 82   | 214  | 0     |
| Cuel | MS  | $-6.37 \pm 2.08 \times 10^{-2}$ | $2.49 \times 10^{-2} \pm 1 \times 10^{-4}$ | 229.5 | 203.3 | 281.8 | 383  | 72   | 273  | 3.3   |
| SanL | MS  | $-5.71 \pm 2.07 \times 10^{-2}$ | $2.00 \times 10^{-2} \pm 1 \times 10^{-4}$ | 285.2 | 236.7 | 335.7 | 349  | 103  | 180  | 0     |
| Vald | MS  | $-6.54 \pm 3.04 \times 10^{-2}$ | $1.84 \times 10^{-2} \pm 1 \times 10^{-4}$ | 339.7 | 260.6 | 423.3 | 377  | 99   | 173  | 0     |

TABLE S5. Associations of environmental variables (first column) with reproductive life-history traits (second column) in *Pinus piaster*. Corrected values indicate slopes, standard errors and *P*-values for the association after including neutral genetic structure corrections (i.e. likelihood ratio test between a full model and a reduced model with just neutral genetic structure); uncorrected values indicate association parameters without correcting for neutral genetic structure (i.e. just environmental data and traits data in the model).

|      | Trait | Corrected                                          |  |                 | Uncorrected                                        |  |                 |
|------|-------|----------------------------------------------------|--|-----------------|----------------------------------------------------|--|-----------------|
|      |       | Slope                                              |  | <i>P</i> -value | Slope                                              |  | <i>P</i> -value |
| Alt  | fTSFR | $-2.02 \times 10^{-1} \pm 7.02 \times 10^{-2}$     |  | 0.011           | $-9.87 \times 10^{-2} \pm 3.13 \times 10^{-2}$     |  | 0.005           |
|      | mTSFR | $-3.37 \times 10^{-2} \pm 1.86 \times 10^{-2}$     |  | 0.090           | $1.39 \times 10^{-3} \pm 9.22 \times 10^{-3}$      |  | 0.881           |
|      | H     | $-4.06 \times 10^{-2} \pm 3.06 \times 10^{-2}$     |  | 0.205           | $-4.68 \times 10^{-2} \pm 9.77 \times 10^{-3}$     |  | 0.000           |
|      | %M    | $-2.21 \times 10^{-2} \pm 1.54 \times 10^{-2}$     |  | 0.171           | $-1.90 \times 10^{-2} \pm 6.65 \times 10^{-3}$     |  | 0.010           |
|      | % F   | $1.57 \times 10^{-2} \pm 1.24 \times 10^{-2}$      |  | 0.223           | $1.33 \times 10^{-2} \pm 4.75 \times 10^{-3}$      |  | 0.011           |
| Lat  | fTSFR | $-8.22 \times 10^{-5} \pm 1.97 \times 10^{-4}$     |  | 0.682           | $-7.02 \times 10^{-5} \pm 5.81 \times 10^{-5}$     |  | 0.241           |
|      | mTSFR | $-5.23 \times 10^{-5} \pm 4.45 \times 10^{-5}$     |  | 0.258           | $2.09 \times 10^{-6} \pm 1.45 \times 10^{-5}$      |  | 0.887           |
|      | H     | $1.84 \times 10^{-5} \pm 7.31 \times 10^{-5}$      |  | 0.805           | $-1.14 \times 10^{-6} \pm 2.25 \times 10^{-5}$     |  | 0.960           |
|      | %M    | $2.01 \times 10^{-5} \pm 3.67 \times 10^{-5}$      |  | 0.593           | $-6.81 \times 10^{-7} \pm 1.24 \times 10^{-5}$     |  | 0.957           |
|      | % F   | $-1.95 \times 10^{-5} \pm 2.90 \times 10^{-5}$     |  | 0.512           | $1.96 \times 10^{-7} \pm 8.80 \times 10^{-6}$      |  | 0.982           |
| Long | fTSFR | $2.08 \times 10^{-5} \pm 1.41 \times 10^{-4}$      |  | 0.885           | $6.58 \times 10^{-5} \pm 5.81 \times 10^{-5}$      |  | 0.271           |
|      | mTSFR | $5.50 \times 10^{-5} \pm 3.01 \times 10^{-5}$      |  | 0.087           | $-8.97 \times 10^{-5} \pm 1.43 \times 10^{-5}$     |  | 0.537           |
|      | H     | $1.84 \times 10^{-5} \pm 5.22 \times 10^{-5}$      |  | 0.729           | $6.02 \times 10^{-5} \pm 1.79 \times 10^{-5}$      |  | 0.003           |
|      | %M    | $-1.24 \times 10^{-5} \pm 2.63 \times 10^{-5}$     |  | 0.645           | $1.61 \times 10^{-5} \pm 1.18 \times 10^{-5}$      |  | 0.189           |
|      | % F   | $1.16 \times 10^{-5} \pm 2.09 \times 10^{-5}$      |  | 0.585           | $-1.08 \times 10^{-5} \pm 8.42 \times 10^{-6}$     |  | 0.214           |
| AMT  | fTSFR | 30.58 ± 16.22                                      |  | 0.079           | 29.46 ± 10.76                                      |  | 0.013           |
|      | mTSFR | -4.59 ± 4.07                                       |  | 0.277           | -1.63 ± 3.01                                       |  | 0.595           |
|      | H     | 9.24 ± 6.24                                        |  | 0.159           | 10.26 ± 4.12                                       |  | 0.022           |
|      | %M    | 6.86 ± 2.88                                        |  | 0.031           | 6.46 ± 2.16                                        |  | 0.007           |
|      | % F   | -4.87 ± 2.37                                       |  | 0.058           | -4.31 ± 1.57                                       |  | 0.012           |
| MTCM | fTSFR | 29.43 ± 7.48                                       |  | 0.001           | 20.01 ± 3.99                                       |  | 0.000           |
|      | mTSFR | -0.91 ± 2.49                                       |  | 0.719           | -1.20 ± 1.42                                       |  | 0.407           |
|      | H     | 8.36 ± 3.31                                        |  | 0.023           | 7.67 ± 1.44                                        |  | 0.000           |
|      | %M    | 4.83 ± 1.56                                        |  | 0.007           | 3.99 ± 0.85                                        |  | 0.000           |
|      | % F   | -3.35 ± 1.33                                       |  | 0.024           | -2.72 ± 0.63                                       |  | 0.000           |
| MTWM | fTSFR | -18.34 ± 6.06                                      |  | 0.009           | -14.18 ± 3.66                                      |  | 0.001           |
|      | mTSFR | -2.19 ± 1.72                                       |  | 0.221           | -0.19 ± 1.16                                       |  | 0.872           |
|      | H     | -5.14 ± 2.52                                       |  | 0.059           | -5.61 ± 1.30                                       |  | 0.000           |
|      | %M    | -2.12 ± 1.33                                       |  | 0.132           | -2.32 ± 0.85                                       |  | 0.013           |
|      | % F   | 1.52 ± 1.08                                        |  | 0.177           | 1.78 ± 0.59                                        |  | 0.006           |
| CI   | fTSFR | -14.08 ± 3.39                                      |  | 0.001           | -9.71 ± 1.91                                       |  | 0.000           |
|      | mTSFR | -0.72 ± 1.15                                       |  | 0.542           | 0.21 ± 0.69                                        |  | 0.762           |
|      | H     | -3.97 ± 1.53                                       |  | 0.020           | -3.78 ± 0.67                                       |  | 0.000           |
|      | %M    | -1.94 ± 0.79                                       |  | 0.026           | -1.75 ± 0.45                                       |  | 0.001           |
|      | % F   | 1.37 ± 0.65                                        |  | 0.052           | 1.27 ± 0.31                                        |  | 0.001           |
| AP   | fTSFR | $4.22 \times 10^{-2} \pm 5.85 \times 10^{-2}$      |  | 0.482           | $1.13 \times 10^{-1} \pm 4.28 \times 10^{-2}$      |  | 0.015           |
|      | mTSFR | $2.47 \times 10^{-3} \pm 1.40 \times 10^{-2}$      |  | 0.862           | $-6.57 \times 10^{-3} \pm 1.19 \times 10^{-2}$     |  | 0.586           |
|      | H     | $3.09 \times 10^{-2} \pm 2.06 \times 10^{-2}$      |  | 0.153           | $4.69 \times 10^{-2} \pm 1.53 \times 10^{-2}$      |  | 0.006           |
|      | %M    | $7.67 \times 10^{-3} \pm 1.10 \times 10^{-2}$      |  | 0.495           | $2.00 \times 10^{-2} \pm 9.22 \times 10^{-3}$      |  | 0.043           |
|      | % F   | $-1.23 \times 10^{-2} \pm 8.28 \times 10^{-3}$     |  | 0.157           | $-1.77 \times 10^{-2} \pm 6.09 \times 10^{-3}$     |  | 0.009           |
| PDM  | fTSFR | 1.14 ± 5.19 × 10 <sup>-1</sup>                     |  | 0.044           | 5.54 × 10 <sup>-1</sup> ± 2.66 × 10 <sup>-1</sup>  |  | 0.050           |
|      | mTSFR | 1.47 × 10 <sup>-1</sup> ± 1.35 × 10 <sup>-1</sup>  |  | 0.294           | -1.11 × 10 <sup>-2</sup> ± 7.05 × 10 <sup>-2</sup> |  | 0.877           |
|      | H     | 2.39 × 10 <sup>-1</sup> ± 2.12 × 10 <sup>-1</sup>  |  | 0.277           | 2.61 × 10 <sup>-1</sup> ± 9.27 × 10 <sup>-2</sup>  |  | 0.011           |
|      | %M    | 1.81 × 10 <sup>-1</sup> ± 1.02 × 10 <sup>-1</sup>  |  | 0.096           | 9.66 × 10 <sup>-2</sup> ± 5.64 × 10 <sup>-2</sup>  |  | 0.102           |
|      | % F   | -1.85 × 10 <sup>-1</sup> ± 7.49 × 10 <sup>-2</sup> |  | 0.026           | -8.79 × 10 <sup>-2</sup> ± 3.81 × 10 <sup>-2</sup> |  | 0.032           |

TABLE S6. Number of trees per population included in the molecular marker analysis and average of individual assignment probability for each of the optimal K=6 clusters (C1 through C6) representing five geographical genetic groups (GG) in *Pinus pinaster*.

| Population | <i>N</i> | C1   | C2   | C3   | C4   | C5   | C6   | GG  |
|------------|----------|------|------|------|------|------|------|-----|
| Mimi       | 19       | 0.74 | 0.01 | 0.02 | 0.01 | 0.06 | 0.15 | AF  |
| Pleu       | 21       | 0.67 | 0.02 | 0.03 | 0.01 | 0.12 | 0.16 | AF  |
| Alto       | 9        | 0.14 | 0.01 | 0.59 | 0.02 | 0.09 | 0.14 | AIP |
| Arma       | 9        | 0.08 | 0.01 | 0.70 | 0.02 | 0.14 | 0.05 | AIP |
| Cada       | 10       | 0.09 | 0.00 | 0.82 | 0.01 | 0.04 | 0.04 | AIP |
| Cast       | 10       | 0.12 | 0.01 | 0.80 | 0.01 | 0.04 | 0.03 | AIP |
| Lamu       | 9        | 0.10 | 0.01 | 0.73 | 0.01 | 0.10 | 0.06 | AIP |
| Leir       | 24       | 0.19 | 0.01 | 0.24 | 0.01 | 0.42 | 0.13 | AIP |
| Puer       | 8        | 0.05 | 0.01 | 0.76 | 0.04 | 0.10 | 0.05 | AIP |
| San        | 12       | 0.15 | 0.01 | 0.51 | 0.02 | 0.25 | 0.06 | AIP |
| Segu       | 21       | 0.12 | 0.01 | 0.50 | 0.01 | 0.23 | 0.13 | AIP |
| Sier       | 10       | 0.21 | 0.01 | 0.41 | 0.02 | 0.13 | 0.21 | AIP |
| Pine       | 10       | 0.05 | 0.03 | 0.03 | 0.80 | 0.05 | 0.04 | CO  |
| Pini       | 14       | 0.01 | 0.02 | 0.02 | 0.92 | 0.01 | 0.01 | CO  |
| Oria       | 29       | 0.10 | 0.54 | 0.07 | 0.03 | 0.16 | 0.11 | MO  |
| Tamr       | 24       | 0.01 | 0.95 | 0.01 | 0.01 | 0.01 | 0.01 | MO  |
| Aren       | 27       | 0.14 | 0.02 | 0.09 | 0.03 | 0.34 | 0.38 | MS  |
| Bayu       | 27       | 0.22 | 0.01 | 0.07 | 0.03 | 0.14 | 0.53 | MS  |
| Carb       | 6        | 0.28 | 0.04 | 0.11 | 0.06 | 0.20 | 0.31 | MS  |
| Ceni       | 9        | 0.30 | 0.01 | 0.13 | 0.02 | 0.19 | 0.35 | MS  |
| Coca       | 19       | 0.26 | 0.08 | 0.13 | 0.06 | 0.26 | 0.22 | MS  |
| Cuel       | 28       | 0.34 | 0.02 | 0.07 | 0.01 | 0.20 | 0.36 | MS  |
| Rodo       | 8        | 0.16 | 0.02 | 0.03 | 0.02 | 0.42 | 0.35 | MS  |
| SanL       | 20       | 0.14 | 0.06 | 0.07 | 0.06 | 0.11 | 0.56 | MS  |
| Vald       | 16       | 0.11 | 0.01 | 0.05 | 0.03 | 0.36 | 0.44 | MS  |
| Total      | 399      |      |      |      |      |      |      |     |
